# Supplementary material for: Short-Term Pre-Operative Protein Caloric Restriction in Elective Vascular Surgery Patients: A Randomized Clinical Trial
Source: MDPI journal article supplement (doi:10.3390/nu13114024), 2021-11-11
Supplement: s1 [file s1]

**Table S1.** Adverse events (AE) at 30 days and one year of follow-up.

| Event                  | 30 Days                   |                            |                              | 1 Year <sup>a</sup>       |                            |
|------------------------|---------------------------|----------------------------|------------------------------|---------------------------|----------------------------|
|                        | AL,<br>N = 3 <sup>b</sup> | PCR,<br>N = 8 <sup>b</sup> | <i>p</i> -Value <sup>c</sup> | AL,<br>N = 3 <sup>b</sup> | PCR,<br>N = 8 <sup>b</sup> |
| Death (All Cause)      | 0 (0%)                    | 0 (0%)                     |                              | 0 (0%)                    | 1 (12%)                    |
| Death (Cardiovascular) | 0 (0%)                    | 0 (0%)                     |                              | 0 (0%)                    | 0 (0%)                     |
| Stroke                 | 0 (0%)                    | 0 (0%)                     |                              | 0 (0%)                    | 0 (0%)                     |
| Myocardial Infarction  | 0 (0%)                    | 1 (12%)                    | >0.9                         | 0 (0%)                    | 1 (12%)                    |
| Coronary Revasc.       | 0 (0%)                    | 0 (0%)                     |                              | 0 (0%)                    | 0 (0%)                     |
| Conduit Thrombosis     | 0 (0%)                    | 2 (25%)                    | >0.9                         | 0 (0%)                    | 2 (25%)                    |
| Reintervention         | 0 (0%)                    | 3 (38%)                    | 0.5                          | 1 (33%)                   | 3 (38%)                    |

<sup>a</sup> 1 year counts inclusive of 30 day counts; <sup>b</sup> n (%); <sup>c</sup> Fisher's exact test.

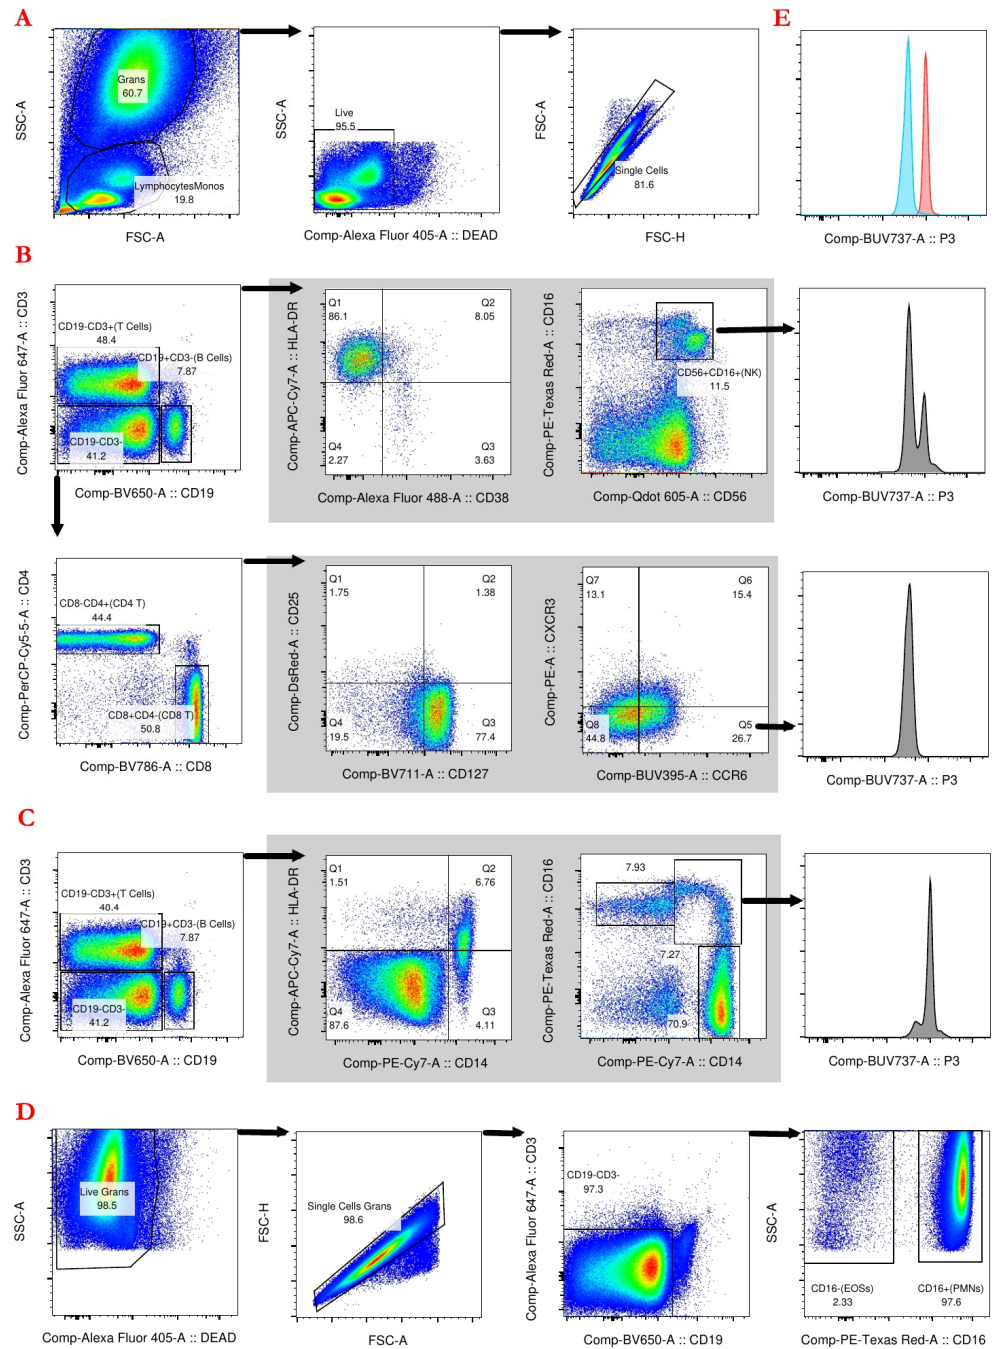

**Figure S1.** Global gating strategy for leukocyte subsets. **(A)** Via SSC-A and FSC-A, granulocyte and lymphocytes/monocytes populations are defined, followed by dead cells exclusion via zombie dye. Via FSC-A and FSC-H, single cells are identified. **(B)** CD3 and CD19 markers allow for discrimination of T cells (CD3+ CD19-) and B cells (CD3- CD19+). Within the T-cell population, CD4+ and CD8+ T cells, regulatory T cells (CD4+ CD25+ CD127-), and, e.g., Th17 cells (CXCR3- CCR6+), can be identified. The MFI for P3 of NK cells has been plotted as an example as well as CD4+ (red) and CD8+ (blue) T cells. **(C)** In CD3- CD19- cells, classical (CD14+ CD16-), intermediate (CD14+ CD16+), and non-classical (CD14- CD16+) monocytes can be identified. In addition, the MFI for P3 of the classical (red), intermediate (green), and non-classical (blue) monocytes is shown. **(D)** Gating strategy to identify granulocytes and granulocyte P3 MFI. **(E)** P3 MFI of T cells (blue) and classical monocytes (red).

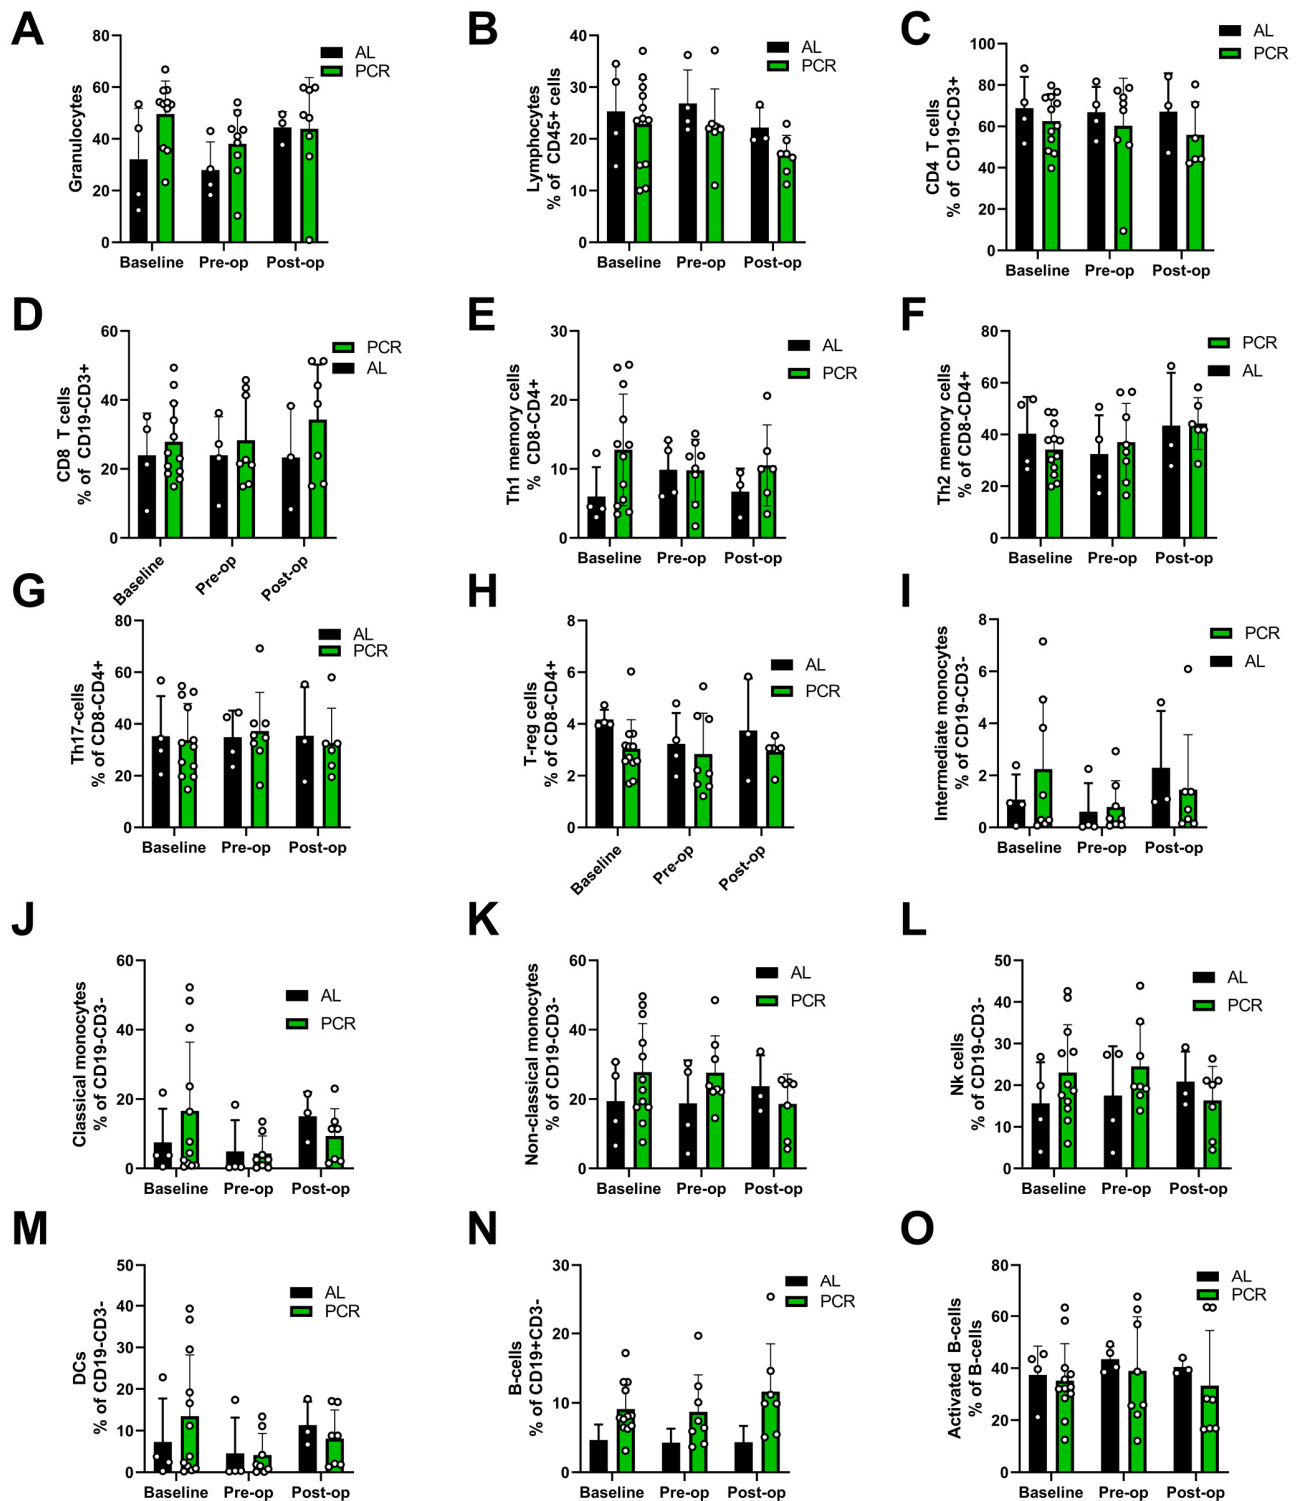

**Figure S2.** Different subsets of leukocytes at baseline, pre-op and post-op day 1 timepoints. All subsets are graphed as a percentage of their parent cell population: (A) Granulocytes. (B) Lymphocytes. (C) CD4 T cells. (D) CD8 T cells. (E) Th1 memory cells. (F) Th2 memory cells. (G) Th17 cells. (H) T-regulatory cells. (I) Intermediate monocytes. (J) Classically activated monocytes. (K) Non-classical activated monocytes. (L) Natural Killer cells (NK). (M) Dendritic cells (DCs). (N) B cells. (O) Activated B cells.
